# Supplementary material for: Morphological and Physio-Chemical Responses to PEG-Induced Water Stress in Vanilla planifolia and V. pompona Hybrids
Source: MDPI journal article supplement (doi:10.3390/ijms24054690), 2023-02-28
Supplement: s1 [file s1]

**Table S1.** Metabolic pathways identified in *Vanilla planifolia* (PL), *V. planifolia* × *V. pompona* (PL × PO) and *V. pompona* × *V. planifolia* (PO × PL) hybrids when it was considered all signals detected. Determination by Mummichog algorithm, KEGG database, and *Oryza sativa* library.

| Pathway                                                | Total | Expected | Hits | p value    | -LOG10(p) | Holm adjust | FDR      | Impact  |
|--------------------------------------------------------|-------|----------|------|------------|-----------|-------------|----------|---------|
| Aminoacyl-tRNA biosynthesis                            | 46    | 1.0164   | 6    | 0.00035338 | 3.4518    | 0.033571    | 0.033571 | 0       |
| Biosynthesis of unsaturated fatty acids                | 22    | 0.4861   | 4    | 0.0010822  | 2.9657    | 0.10173     | 0.051407 | 0       |
| Sphingolipid metabolism                                | 17    | 0.37562  | 3    | 0.0053893  | 2.2685    | 0.50121     | 0.15131  | 0.28846 |
| Arginine biosynthesis                                  | 18    | 0.39772  | 3    | 0.0063709  | 2.1958    | 0.58612     | 0.15131  | 0.30972 |
| Phenylalanine, tyrosine and tryptophan biosynthesis    | 22    | 0.4861   | 3    | 0.011324   | 1.946     | 1           | 0.17929  | 0.02152 |
| Starch and sucrose metabolism                          | 22    | 0.4861   | 3    | 0.011324   | 1.946     | 1           | 0.17929  | 0.0889  |
| Arginine and proline metabolism                        | 28    | 0.61867  | 3    | 0.022022   | 1.6571    | 1           | 0.29887  | 0.28609 |
| Phenylpropanoid biosynthesis                           | 35    | 0.77334  | 3    | 0.039642   | 1.4018    | 1           | 0.47075  | 0.03391 |
| Butanoate metabolism                                   | 17    | 0.37562  | 2    | 0.052299   | 1.2815    | 1           | 0.55205  | 0       |
| Porphyrin and chlorophyll metabolism                   | 47    | 1.0385   | 3    | 0.082235   | 1.0849    | 1           | 0.67754  | 0.02435 |
| Alanine, aspartate and glutamate metabolism            | 22    | 0.4861   | 2    | 0.082996   | 1.0809    | 1           | 0.67754  | 0.32374 |
| Linoleic acid metabolism                               | 4     | 0.088382 | 1    | 0.085584   | 1.0676    | 1           | 0.67754  | 1       |
| Cyanoamino acid metabolism                             | 26    | 0.57448  | 2    | 0.11063    | 0.95613   | 1           | 0.74619  | 0       |
| Glutathione metabolism                                 | 27    | 0.59658  | 2    | 0.11788    | 0.92855   | 1           | 0.74619  | 0.05016 |
| Galactose metabolism                                   | 27    | 0.59658  | 2    | 0.11788    | 0.92855   | 1           | 0.74619  | 0.11896 |
| Isoquinoline alkaloid biosynthesis                     | 6     | 0.13257  | 1    | 0.12567    | 0.90075   | 1           | 0.74619  | 0.41176 |
| Tropane, piperidine and pyridine alkaloid biosynthesis | 8     | 0.17676  | 1    | 0.16406    | 0.785     | 1           | 0.91681  | 0       |
| Nitrogen metabolism                                    | 12    | 0.26515  | 1    | 0.236      | 0.62709   | 1           | 1        | 0       |
| Phenylalanine metabolism                               | 12    | 0.26515  | 1    | 0.236      | 0.62709   | 1           | 1        | 0.42308 |
| Cutin, suberine and wax biosynthesis                   | 14    | 0.30934  | 1    | 0.26969    | 0.56914   | 1           | 1        | 0       |
| Tyrosine metabolism                                    | 18    | 0.39772  | 1    | 0.3328     | 0.47782   | 1           | 1        | 0.16757 |
| Pentose phosphate pathway                              | 19    | 0.41981  | 1    | 0.34773    | 0.45875   | 1           | 1        | 0       |
| Valine, leucine and isoleucine biosynthesis            | 22    | 0.4861   | 1    | 0.39062    | 0.40825   | 1           | 1        | 0       |
| Pantothenate and CoA biosynthesis                      | 23    | 0.5082   | 1    | 0.4043     | 0.3933    | 1           | 1        | 0.14039 |
| Tryptophan metabolism                                  | 23    | 0.5082   | 1    | 0.4043     | 0.3933    | 1           | 1        | 0.17241 |
| Purine metabolism                                      | 63    | 1.392    | 2    | 0.40988    | 0.38734   | 1           | 1        | 0.00126 |

|                                                     |    |         |   |         |         |   |   |         |
|-----------------------------------------------------|----|---------|---|---------|---------|---|---|---------|
| alpha-Linolenic acid metabolism                     | 27 | 0.59658 | 1 | 0.4561  | 0.34094 | 1 | 1 | 0.11368 |
| Glyoxylate and dicarboxylate metabolism             | 29 | 0.64077 | 1 | 0.48034 | 0.31845 | 1 | 1 | 0.0531  |
| Glycine, serine and threonine metabolism            | 33 | 0.72915 | 1 | 0.52572 | 0.27924 | 1 | 1 | 0       |
| Ubiquinone and other terpenoid-quinone biosynthesis | 35 | 0.77334 | 1 | 0.54695 | 0.26205 | 1 | 1 | 0       |
| Valine, leucine and isoleucine degradation          | 37 | 0.81753 | 1 | 0.56726 | 0.24622 | 1 | 1 | 0.00991 |
| Cysteine and methionine metabolism                  | 46 | 1.0164  | 1 | 0.64825 | 0.18826 | 1 | 1 | 0.02392 |
| Flavonoid biosynthesis                              | 47 | 1.0385  | 1 | 0.65628 | 0.18291 | 1 | 1 | 0.00032 |

---

FDR: value adjusted using False Discovery Rate

**Table S2.** Metabolites tentatively identified in *Vanilla planifolia* (PL), *V. planifolia* × *V. pompona* (PL × PO) and *V. pompona* × *V. planifolia* (PO × PL) hybrids when it was considered all signals detected.

| RT    | m/z      | Adduct                              | Tentative metabolite               | KEGG ID | Mass difference | Fragments                            |
|-------|----------|-------------------------------------|------------------------------------|---------|-----------------|--------------------------------------|
| 0.39  | 131.082  | [M-H] <sup>-</sup>                  | Ornithine                          | C00077  | 0.0006          |                                      |
| 0.4   | 175.1192 | [M+H] <sup>+</sup>                  | L-Arginine                         | C00062  | 0.0002          | 158.0927, 116.0709                   |
| 0.43  | 84.04453 | [M-H <sub>2</sub> O+H] <sup>+</sup> | 1-Aminocyclopropanecarboxylic acid | C01234  | 0.0002          |                                      |
| 0.44  | 287.0557 | [M-H] <sup>-</sup>                  | Fustin                             | C01378  | 0.0004          | 109.0402                             |
| 0.45  | 517.1402 | [M-H <sub>2</sub> O-H] <sup>-</sup> | Galabiose                          | C00760  | 0.0003          |                                      |
| 0.45  | 133.0611 | [M+H] <sup>+</sup>                  | L-Asparagine                       | C00152  | 0.0003          |                                      |
| 0.46  | 195.0506 | [M-H] <sup>-</sup>                  | Gluconic acid                      | C00257  | 0.0004          |                                      |
| 0.47  | 539.1372 | [M+Cl] <sup>-</sup>                 | Disaccharide                       | C00492  | 0.0007          |                                      |
| 0.48  | 377.0844 | [M+Cl] <sup>-</sup>                 | Sucrose                            | C00089  | 0.0007          | 341.1088, 161.0447, 85.0286, 71.0135 |
| 0.5   | 503.1603 | [M-H] <sup>-</sup>                  | Dextrin                            | C00721  | 0.0015          |                                      |
| 0.64  | 262.1286 | [M+H] <sup>+</sup>                  | Lotaustralin                       | C08334  | 0.0001          |                                      |
| 0.77  | 130.0499 | [M-H <sub>2</sub> O+H] <sup>+</sup> | L-Glutamic acid                    | C00025  | 0.0001          |                                      |
| 0.87  | 180.0658 | [M-H] <sup>-</sup>                  | L-Tyrosine                         | C00082  | 0.0008          |                                      |
| 1.13  | 268.1039 | [M+H] <sup>+</sup>                  | Adenosine                          | C00212  | 0.0001          | 136.062                              |
| 1.2   | 152.0569 | [M+H] <sup>+</sup>                  | Guanine                            | C00242  | 0.0002          |                                      |
| 1.58  | 164.0711 | [M-H] <sup>-</sup>                  | L-Phenylalanine                    | C00079  | 0.0006          |                                      |
| 2.22  | 203.082  | [M-H] <sup>-</sup>                  | L-Tryptophan                       | C00078  | 0.0006          |                                      |
| 5.19  | 187.0022 | [M+Cl] <sup>-</sup>                 | Xanthine                           | C00385  | 0.0001          |                                      |
| 6.2   | 177.0551 | [M-H <sub>2</sub> O+H] <sup>+</sup> | trans-Ferulic acid                 | C01494  | 0.0005          |                                      |
| 9.31  | 245.0959 | [M+H] <sup>+</sup>                  | Biotin                             | C00120  | 0.0001          |                                      |
| 10.26 | 89.0599  | [M+H] <sup>+</sup>                  | Butyric acid                       | C00246  | 0.0002          |                                      |
| 10.27 | 131.0707 | [M+H] <sup>+</sup>                  | Ketoleucine                        | C00233  | 0.0004          |                                      |
| 11.25 | 302.3053 | [M+H] <sup>+</sup>                  | Sphinganine                        | C00836  | 0.0001          |                                      |
| 11.46 | 318.2989 | [M+H] <sup>+</sup>                  | Phytosphingosine                   | C12144  | 0.0014          |                                      |
| 13.22 | 279.2319 | [M+H] <sup>+</sup>                  | α-Linolenic acid                   | C06427  | 0.0000          |                                      |
| 13.6  | 341.0936 | [M-H <sub>2</sub> O+H] <sup>+</sup> | Pantetheine 4'-phosphate           | C01134  | 0.0006          |                                      |
| 13.98 | 137.0238 | [M+Cl] <sup>-</sup>                 | p-Hydroxybenzoic acid              | C00156  | 0.0001          |                                      |
| 14.34 | 211.0008 | [M+Cl] <sup>-</sup>                 | Ascorbic acid                      | C00072  | 0.0001          |                                      |
| 14.41 | 300.0811 | [M+Cl] <sup>-</sup>                 | Thiamine                           | C00378  | 0.0001          |                                      |

|       |          |                                     |                            |        |        |
|-------|----------|-------------------------------------|----------------------------|--------|--------|
| 16.39 | 279.2322 | [M+H] <sup>+</sup>                  | γ-Linolenic acid           | C06426 | 0.0003 |
| 16.95 | 609.2705 | [M-H <sub>2</sub> O+H] <sup>+</sup> | Red chlorophyll catabolite | C18022 | 0.0002 |
| 17.16 | 282.2792 | [M-H <sub>2</sub> O+H] <sup>+</sup> | Sphingosine                | C00319 | 0.0001 |
| 17.39 | 337.2346 | [M+Na] <sup>+</sup>                 | 9,10-Epoxystearic acid     | C19620 | 0.0003 |
| 17.51 | 609.2695 | [M-H <sub>2</sub> O+H] <sup>+</sup> | Red chlorophyll catabolite | C18022 | 0.0012 |
| 17.95 | 593.275  | [M+H] <sup>+</sup>                  | Pheophorbide A             | C18021 | 0.0008 |
| 18.81 | 284.2941 | [M-H <sub>2</sub> O+H] <sup>+</sup> | Sphinganine                | C00836 | 0.0007 |

---

RT: Retention time (minutes), m/z: observed mass/charge ratio. The mass difference is expressed in Daltons.

**Table S3.** Differential metabolites (fold change > 2) tentatively identified in *Vanilla planifolia* × *V. pompona* (PL × PO) respect to *V. planifolia* (PL) due to exposure to 20 days of water stress.

| RT    | m/z      | FC      | p value    | Compound name                 | Ionization mode |
|-------|----------|---------|------------|-------------------------------|-----------------|
| 10.27 | 131.0707 | 9060.9  | 0.024603   | Ketoleucine                   | Positive        |
| 0.46  | 195.0506 | 126.06  | 0.035725   | Gluconic acid                 | Negative        |
| 0.87  | 180.0658 | 75.387  | 0.029764   | L-Tyrosine                    | Negative        |
| 10.26 | 89.0599  | 50.396  | 0.00028234 | Butyric acid                  | Positive        |
| 1.58  | 164.0711 | 40.309  | 0.0011963  | L-Phenylalanine               | Negative        |
| 0.45  | 133.0611 | 23.918  | 0.000003   | L-Asparagine                  | Positive        |
| 0.47  | 539.1372 | 20.907  | 0.01575    | Disaccharide                  | Negative        |
| 1.2   | 152.0569 | 20.1576 | 0.000007   | Guanine                       | Positive        |
| 0.48  | 377.0844 | 12.03   | 0.014075   | Sucrose                       | Negative        |
| 13.98 | 137.0238 | 6.7492  | 0.0090387  | <i>p</i> -Hydroxybenzoic acid | Negative        |
| 0.45  | 517.1402 | 5.7962  | 0.003182   | Galabiose                     | Negative        |
| 0.77  | 130.0499 | 5.6323  | 0.0031837  | L-Glutamic acid               | Negative        |
| 2.22  | 203.082  | 5.4241  | 0.000006   | L-Tryptophan                  | Negative        |
| 1.13  | 268.1039 | 3.3031  | 0.0065064  | Adenosine                     | Positive        |
| 17.16 | 282.2792 | 2.9707  | 0.0027435  | Sphingosine                   | Positive        |
| 5.19  | 187.0022 | 2.9439  | 0.0032244  | Xanthine                      | Negative        |
| 15.23 | 309.2027 | 2.9392  | 0.005795   | Hexadecanedioic acid          | Positive        |
| 9.31  | 245.0959 | 2.9177  | 0.003479   | Biotin                        | Positive        |
| 17.39 | 337.2346 | 2.7698  | 0.0017257  | 9,10-Epoxy stearic acid       | Positive        |
| 18.29 | 593.2746 | 2.7353  | 0.0033474  | Pheophorbide A                | Positive        |
| 18.81 | 284.2941 | 2.4795  | 0.011258   | Sphinganine                   | Positive        |

RT: Retention time (minutes), m/z: observed mass/charge ratio. FC: Fold Change.

**Table S4.** Differential metabolites (Fold change > 2) tentatively identified in *Vanilla planifolia* × *V. pompona* (PL × PO) respect to *V. planifolia* (PL) due to exposure to 40 days of water stress.

| RT    | m/z      | FC      | p value    | Compound name               | Ionization mode |
|-------|----------|---------|------------|-----------------------------|-----------------|
| 0.48  | 377.0844 | 511.49  | 0.01856    | Sucrose                     | Negative        |
| 10.27 | 131.0707 | 77      | 0.027956   | Ketoleucine                 | Positive        |
| 0.45  | 517.1402 | 47.987  | 0.0021397  | Galabiose                   | Negative        |
| 1.2   | 152.0569 | 20.1576 | 0.000007   | Guanine                     | Positive        |
| 10.26 | 89.0599  | 17.191  | 0.0060712  | Butyric acid                | Positive        |
| 16.39 | 279.2322 | 8.1653  | 0.00061716 | γ-Linolenic acid            | Positive        |
| 13.22 | 279.2319 | 5.8874  | 0.000005   | α-Linolenic acid            | Positive        |
| 19.65 | 307.2628 | 5.6019  | 0.000001   | 8,11,14-Eicosatrienoic acid | Positive        |
| 1.58  | 164.0711 | 5.5878  | 0.000009   | L-Phenylalanine             | Negative        |
| 2.22  | 203.082  | 5.4241  | 0.000006   | L-Tryptophan                | Negative        |
| 14.34 | 211.0008 | 4.2098  | 0.0071595  | Ascorbic acid               | Negative        |
| 5.19  | 187.0022 | 3.9439  | 0.0032244  | Xanthine                    | Negative        |
| 1.13  | 268.1039 | 3.3031  | 0.0065064  | Adenosine                   | Positive        |
| 0.47  | 539.1372 | 2.9092  | 0.0071325  | Disaccharide                | Negative        |
| 0.46  | 195.0506 | 2.179   | 0.089374   | Gluconic acid               | Negative        |

RT: Retention time (minutes), m/z: observed mass/charge ratio. FC: Fold Change.

**Table S5.** Differential metabolites (Fold change > 2) tentatively identified in *Vanilla pompona* × *V. planifolia* (PO × PL) respect to *V. planifolia* (PL) due to exposure to 20 days of water stress.

| RT    | m/z      | FC      | p value      | Compound name                 | Ionization mode |
|-------|----------|---------|--------------|-------------------------------|-----------------|
| 10.27 | 596.364  | 7491.6  | 0.0246       | Ketoleucine                   | Positive        |
| 0.46  | 195.0506 | 135.9   | 0.032891     | Gluconic acid                 | Negative        |
| 0.87  | 180.0658 | 81.445  | 0.026631     | L-Tyrosine                    | Negative        |
| 10.26 | 89.0599  | 53.756  | 0.00046958   | Butyric acid                  | Positive        |
| 1.58  | 164.0711 | 40.309  | 0.0011963    | L-Phenylalanine               | Negative        |
| 0.48  | 377.0844 | 27.818  | 0.038817     | Sucrose                       | Negative        |
| 19.65 | 307.2628 | 23.108  | 0.001451     | 8,11,14-Eicosatrienoic acid   | Positive        |
| 0.47  | 539.1372 | 22.604  | 0.01231      | Disaccharide                  | Negative        |
| 0.45  | 133.0611 | 20.697  | 0.0000012801 | L-Asparagine                  | Positive        |
| 1.2   | 152.0569 | 20.1576 | 0.0000723    | Guanine                       | Positive        |
| 9.31  | 245.0787 | 16.16   | 0.00016983   | Biotin                        | Positive        |
| 13.98 | 137.0238 | 7.2879  | 0.004255     | <i>p</i> -Hydroxybenzoic acid | Negative        |
| 14.34 | 211.0008 | 6.6588  | 0.00051359   | Ascorbic acid                 | Negative        |
| 0.4   | 175.1192 | 6.2712  | 0.0016807    | L-Arginine                    | Negative        |
| 0.77  | 130.0499 | 6.1286  | 0.00066024   | L-Glutamic acid               | Negative        |
| 2.22  | 203.082  | 5.4241  | 0.000006     | L-Tryptophan                  | Negative        |
| 13.22 | 279.2319 | 3.5684  | 0.0060272    | $\alpha$ -Linolenic acid      | Positive        |
| 1.13  | 268.1039 | 3.3031  | 0.0065064    | Adenosine                     | Positive        |
| 18.81 | 284.2941 | 2.7612  | 0.011819     | Sphinganine                   | Positive        |
| 17.39 | 337.2346 | 2.7327  | 0.0064241    | 9,10-Epoxy stearic acid       | Positive        |
| 15.23 | 309.2027 | 2.6302  | 0.020651     | Hexadecanedioic acid          | Positive        |

RT: Retention time (minutes), m/z: observed mass/charge ratio. FC: Fold Change.

**Table S6.** Differential metabolites (Fold change > 2) tentatively identified in *Vanilla pompona* × *V. planifolia* (PO × PL) respect to *V. planifolia* (PL) due to exposure to 40 days of water stress.

| RT    | m/z      | FC      | p value   | Compound name               | Ionization mode |
|-------|----------|---------|-----------|-----------------------------|-----------------|
| 0.45  | 133.0611 | 69.638  | 0.042323  | L-Asparagine                | Positive        |
| 10.27 | 596.364  | 46.451  | 0.044902  | Ketoleucine                 | Positive        |
| 0.4   | 175.1192 | 22.534  | 0.0993    | L-Arginine                  | Negative        |
| 1.2   | 152.0569 | 20.1576 | 0.0000723 | Guanine                     | Positive        |
| 14.76 | 248.0784 | 20.072  | 0.044928  | Deoxyguanosine              | Negative        |
| 10.26 | 89.0599  | 15.358  | 0.03919   | Butyric acid                | Positive        |
| 0.77  | 130.0499 | 10.697  | 0.044146  | L-Glutamic acid             | Negative        |
| 14.34 | 211.0008 | 6.9971  | 0.049997  | Ascorbic acid               | Negative        |
| 0.48  | 143.0343 | 5.3417  | 0.043201  | Sucrose                     | Negative        |
| 16.39 | 279.2322 | 4.9399  | 0.0066307 | γ-Linolenic acid            | Positive        |
| 0.45  | 517.1402 | 4.411   | 0.050389  | Galabiose                   | Negative        |
| 13.98 | 137.0238 | 4.1834  | 0.050665  | p-Hydroxybenzoic acid       | Negative        |
| 13.22 | 279.2319 | 3.5684  | 0.0060272 | α-Linolenic acid            | Positive        |
| 18.81 | 284.2941 | 3.4985  | 0.0059782 | Sphinganine                 | Positive        |
| 0.47  | 539.1372 | 3.4713  | 0.070816  | Disaccharide                | Negative        |
| 19.65 | 307.2628 | 3.3941  | 0.0064076 | 8,11,14-Eicosatrienoic acid | Positive        |
| 1.58  | 164.0711 | 3.3852  | 0.006183  | L-Phenylalanine             | Negative        |
| 1.13  | 268.1039 | 3.3031  | 0.0065064 | Adenosine                   | Positive        |
| 2.22  | 203.082  | 3.2871  | 0.0066341 | L-Tryptophan                | Negative        |
| 17.39 | 337.2346 | 3.2855  | 0.0066476 | 9,10-Epoxy stearic acid     | Positive        |
| 0.87  | 180.0658 | 3.2844  | 0.071636  | L-Tyrosine                  | Negative        |
| 11.46 | 318.2989 | 3.2716  | 0.0066876 | Phytosphingosine            | Positive        |
| 17.16 | 282.2792 | 3.2424  | 0.0069119 | Sphingosine                 | Positive        |
| 0.64  | 262.1286 | 3.2254  | 0.046892  | Lotaustralin                | Positive        |
| 17.95 | 593.275  | 3.21    | 0.0071724 | Pheophorbide A              | Positive        |
| 0.46  | 195.0506 | 2.6691  | 0.083823  | Gluconic acid               | Negative        |

RT: Retention time (minutes), m/z: observed mass/charge ratio. FC: Fold Change.

**Table S7.** Identification and quantification of phenolic compounds in *Vanilla planifolia* × *V. pompona* (PL × PO) *V. pompona* × *V. planifolia* (PO × PL) and *V. planifolia* (PL) due to exposure to 20 and 40 days of water stress.

| SAMPLES          | Phenylalanine          | Salicylic acid        | Vanillic acid         | Vanillin             | Ferulic acid          | Sinapic acid           |
|------------------|------------------------|-----------------------|-----------------------|----------------------|-----------------------|------------------------|
| PL-0 PEG-20      | 467.49 ± 3.96 <b>b</b> | ---                   | 3.52 ± 0.08 <b>b</b>  | 2.3 ± 0.04 <b>c</b>  | 28.75 ± 0.62 <b>a</b> | 6.63 ± 0.04 <b>b</b>   |
| PL × PO-0 PEG-20 | 307.26 ± 2.14 <b>e</b> | ---                   | 4.12 ± 0.1 <b>a</b>   | 1.94 ± 0.04 <b>d</b> | 21.95 ± 0.03 <b>d</b> | 1.33 ± 0.04 <b>g</b>   |
| PO × PL-0 PEG-20 | 216.92 ± 1.64 <b>h</b> | 1.39 ± 0.03 <b>a</b>  | 2.3 ± 0.01 <b>c</b>   | 3.11 ± 0.08 <b>b</b> | 7.88 ± 0.09 <b>h</b>  | 0.31 ± 0.02* <b>ij</b> |
| PL-5 PEG-20      | 201.13 ± 1.01 <b>i</b> | ---                   | 1.76 ± 0.05 <b>e</b>  | 1.54 ± 0.04 <b>e</b> | 27.56 ± 0.27 <b>b</b> | 8 ± 0.03 <b>a</b>      |
| PL × PO-5 PEG-20 | 280.86 ± 1.39 <b>f</b> | ---                   | 1.53 ± 0.02 <b>f</b>  | 2.42 ± 0.05 <b>c</b> | 19.44 ± 0.31 <b>e</b> | 3.94 ± 0.15 <b>d</b>   |
| PO × PL-5 PEG-20 | 181.46 ± 2.3 <b>j</b>  | 0.41 ± 0.03* <b>b</b> | 0.67 ± 0.02* <b>i</b> | 2.42 ± 0.07 <b>c</b> | 6.45 ± 0.06 <b>i</b>  | 0.5 ± 0.02* <b>hi</b>  |
| PL-0 PEG-40      | 535.28 ± 2.06 <b>a</b> | ---                   | 2.45 ± 0.1 <b>c</b>   | 1.89 ± 0.03 <b>d</b> | 24.28 ± 0.1 <b>c</b>  | 6.08 ± 0.04 <b>c</b>   |
| PL × PO-0 PEG-40 | 424.31 ± 2.99 <b>c</b> | ---                   | 0.75 ± 0* <b>hi</b>   | 1.96 ± 0.01 <b>d</b> | 7.77 ± 0.15 <b>h</b>  | 2.88 ± 0.07 <b>f</b>   |
| PO × PL-0 PEG-40 | 272.01 ± 1.01 <b>g</b> | ---                   | 2.04 ± 0.02 <b>d</b>  | 4.34 ± 0.06 <b>a</b> | 7.43 ± 0.07 <b>h</b>  | 0.21 ± 0.06* <b>j</b>  |
| PL-5 PEG-40      | 308.58 ± 1.57 <b>e</b> | ---                   | 1.23 ± 0.05* <b>g</b> | 1.49 ± 0.04 <b>e</b> | 13.77 ± 0.1 <b>g</b>  | 4.06 ± 0.11 <b>d</b>   |
| PL × PO-5 PEG-40 | 349.84 ± 2.59 <b>d</b> | ---                   | 0.89 ± 0.05* <b>h</b> | 1.89 ± 0.05 <b>d</b> | 15.85 ± 0.21 <b>f</b> | 3.37 ± 0.03 <b>e</b>   |
| PO × PL-5 PEG-40 | 536.75 ± 6.59 <b>a</b> | ---                   | 0.46 ± 0.02* <b>j</b> | 1.45 ± 0.07 <b>e</b> | 5.07 ± 0.13 <b>j</b>  | 0.59 ± 0.01* <b>h</b>  |

PL: *Vanilla planifolia*, PL × PO: *V. planifolia* × *V. pompona*, PO × PL: *V. pompona* × *V. planifolia*, 0 PEG: hydration status (control group, -0.08 mPa), 5 PEG: hydric stress (-0.49 mPa), 20: 20 days of water stress exposure, 40: 40 days of water stress exposure. Concentration is expressed in µg/g of dried extract, and it is shown the average of three determinations plus and minus the standard deviation. "---": Not identified. \*: Value determined below the limit of quantification. Values with different letters are significantly different ( $p < 0.05$ ), according to ANOVA and *post hoc* Tukey test.

**Table S7** (continuation). Identification and quantification of phenolic compounds in *Vanilla planifolia* × *V. pompona* and *V. pompona* × *V. planifolia* hybrids, and the species *V. planifolia* due to exposure to 20 and 40 days of water stress.

| SAMPLES          | 4-Coumaric acid       | <i>trans</i> -Cinnamic acid | Luteolin              | Protocatechuic acid   | 4-Hydroxybenzoic acid |
|------------------|-----------------------|-----------------------------|-----------------------|-----------------------|-----------------------|
| PL-0 PEG-20      | 42.3 ± 0.24 <b>b</b>  | 0.83 ± 0.02 <b>c</b>        | ---                   | 0.11 ± 0.01* <b>d</b> | 2.36 ± 0.05 <b>a</b>  |
| PL × PO-0 PEG-20 | 7.12 ± 0.02 <b>k</b>  | 0.2 ± 0.03* <b>fg</b>       | 0.07 ± 0.01* <b>e</b> | 0.4 ± 0* <b>c</b>     | 1.91 ± 0.02 <b>b</b>  |
| PO × PL-0 PEG-20 | 9.21 ± 0.05 <b>j</b>  | 1.39 ± 0.03 <b>b</b>        | 4.64 ± 0.05 <b>a</b>  | 0.84 ± 0.01* <b>a</b> | 1.5 ± 0.02 <b>d</b>   |
| PL-5 PEG-20      | 37.66 ± 0.25 <b>d</b> | 0.15 ± 0.01* <b>g</b>       | ---                   | ---                   | 1.45 ± 0.03 <b>d</b>  |
| PL × PO-5 PEG-20 | 38.56 ± 0.29 <b>c</b> | 0.17 ± 0.01 <b>g</b>        | ---                   | 0.04 ± 0* <b>f</b>    | 1.34 ± 0.02 <b>e</b>  |
| PO × PL-5 PEG-20 | 30.29 ± 0.49 <b>f</b> | 0.4 ± 0.01* <b>e</b>        | ---                   | 0.09 ± 0.01* <b>e</b> | 1.07 ± 0.02 <b>g</b>  |
| PL-0 PEG-40      | 35.24 ± 0.23 <b>e</b> | 0.25 ± 0.03* <b>f</b>       | 0.81 ± 0.07* <b>c</b> | ---                   | 1.29 ± 0.04 <b>e</b>  |
| PL × PO-0 PEG-40 | 28.12 ± 0.08 <b>g</b> | 0.87 ± 0.03* <b>c</b>       | 0.38 ± 0.02* <b>d</b> | ---                   | 0.84 ± 0.01* <b>h</b> |
| PO × PL-0 PEG-40 | 9.11 ± 0.07 <b>j</b>  | 1.4 ± 0.05* <b>b</b>        | 4.71 ± 0.09 <b>a</b>  | 0.8 ± 0.01* <b>b</b>  | 1.8 ± 0 <b>c</b>      |
| PL-5 PEG-40      | 22.38 ± 0.14 <b>i</b> | 0.26 ± 0.01* <b>f</b>       | ---                   | ---                   | 1.33 ± 0.03 <b>e</b>  |
| PL × PO-5 PEG-40 | 58.69 ± 0.61 <b>a</b> | 1.79 ± 0.02 <b>a</b>        | 4.26 ± 0.06 <b>b</b>  | ---                   | 1.3 ± 0.03 <b>e</b>   |
| PO × PL-5 PEG-40 | 25.79 ± 0.31 <b>h</b> | 0.52 ± 0* <b>d</b>          | ---                   | 0.09 ± 0* <b>e</b>    | 1.2 ± 0.02 <b>f</b>   |

PL: *Vanilla planifolia*, PL × PO: *V. planifolia* × *V. pompona*, PO × PL: *V. pompona* × *V. planifolia*, 0 PEG: hydration status (control group, -0.08 mPa), 5 PEG: hydric stress (-0.49 mPa), 20: 20 days of water stress exposure, 40: 40 days of water stress exposure. Concentration is expressed in µg/g of dried extract, and it is shown the average of three determinations plus and minus the standard deviation. "---": Not identified. \*: Value determined below the limit of quantification. Values with different letters are significantly different ( $p < 0.05$ ), according to ANOVA and *post hoc* Tukey test.
